# Supplementary material for: A 3D Human Renal Cell Carcinoma-on-a-Chip for the Study of Tumor Angiogenesis
Source: PubMed Central journal article supplement — Neoplasia. 2018 May 7;20(6):610–20. doi: 10.1016/j.neo.2018.02.011 (PMC5994779; doi:10.1016/j.neo.2018.02.011), 2018-05-07
Supplement: mmc2.pdf [file mmc2.pdf]

**Supplementary Table S1. Histopathology of ccRCC Specimens**

| <b>Specimen</b> | <b>Tumor Grade</b>       | <b>Classification</b> | <b>Greatest Diameter (cm)</b> |
|-----------------|--------------------------|-----------------------|-------------------------------|
| B8              | 2 (Fuhrman)              | pT3a                  | 5                             |
| B16             | 1 (Fuhrman)              | pT1a                  | 4                             |
| B31             | 3 (Fuhrman) <sup>a</sup> | pT1b                  | 4.5                           |
| B44             | 3 (Fuhrman)              | pT3a                  | 7.5                           |
| B46             | 2 (Fuhrman)              | pT3a                  | 6.5                           |
| B58             | 2 (ISUP) <sup>b</sup>    | pT1a                  | 3.5                           |
| B62             | 4 (ISUP)                 | pT3a                  | 7.2                           |
| B63             | 3 (ISUP)                 | pT3                   | 2.6                           |
| B65             | 4 (ISUP)                 | pT4                   | 9.6                           |
| B71             | 4 (ISUP)                 | pT3                   | 10.5                          |
| H24             | 2 (Fuhrman)              | pT3a                  | 9                             |
| H25             | 2 (Fuhrman)              | pT2a                  | 10                            |

<sup>a</sup> The majority of tumor cells are grade 1 to 2

<sup>b</sup> ISUP, International Society of Urological Pathology
