# Supplementary material for: A 3D Human Renal Cell Carcinoma-on-a-Chip for the Study of Tumor Angiogenesis
Source: PubMed Central journal article supplement — Neoplasia. 2018 May 7;20(6):610–20. doi: 10.1016/j.neo.2018.02.011 (PMC5994779; doi:10.1016/j.neo.2018.02.011), 2018-05-07
Supplement: mmc3.pdf [file mmc3.pdf]

**Supplementary Table S2. Real Time PCR Primers**

| <b>SYBR Green</b> | <b>Gene Symbol</b> | <b>Forward primer 5'-3'</b>        | <b>Reverse Primer 5'-3'</b> |
|-------------------|--------------------|------------------------------------|-----------------------------|
|                   | <i>ANGPTL4</i>     | GGCTCAGTGGACTTCAACCG               | CCGTGATGCTATGCACCTTCT       |
|                   | <i>CA9</i>         | CTGTCTCGCTTGGAAGAAATCG             | GCAGGAGTGCAGATATGTCCAG      |
|                   | <i>PGF</i>         | GTGGAGCTGACGTTCTCTCA               | AGCATCGCCGCACCTTTC          |
| <b>TaqMan</b>     | <b>Gene Symbol</b> | <b>Applied Biosystems Assay ID</b> |                             |
|                   | <i>HMBS</i>        | Hs_00609297_m1                     |                             |
|                   | <i>VEGFA</i>       | Hs_00900055_m1                     |                             |
